# Supplementary material for: Tumor suppressor properties of the small C-terminal domain phosphatases in non-small cell lung cancer
Source: PubMed Central journal article supplement (PMC6911153; doi:10.1042/bsr20193094), 2019-12-13
Supplement: BSR-2019-3094_supp.pdf [file BSR-2019-3094_supp.pdf]

## Supplementary material

### Tables S1 to S7

**Table S1. Clinical and pathological characteristics of samples used to extract RNA for qPCR experiments**

| Characteristic:                                                                                                                                                                                       |                                                 |           |
|-------------------------------------------------------------------------------------------------------------------------------------------------------------------------------------------------------|-------------------------------------------------|-----------|
| Age of patients                                                                                                                                                                                       | 39 – 81<br>(mean 59)                            |           |
| TNM/Stage                                                                                                                                                                                             | Histological type of NSCLC<br>(no. of patients) |           |
|                                                                                                                                                                                                       | SCC                                             | ADC       |
| T <sub>1</sub> N <sub>0</sub> M <sub>0</sub> , T <sub>2</sub> N <sub>0</sub> M <sub>0</sub> /Stage (IA+ IB)                                                                                           | 10                                              | 5         |
| T <sub>3</sub> N <sub>0</sub> M <sub>0</sub> , T <sub>2</sub> N <sub>1</sub> M <sub>0</sub> /Stage IIB                                                                                                | 10                                              | 1         |
| T <sub>1</sub> N <sub>2</sub> M <sub>0</sub> , T <sub>2</sub> N <sub>2</sub> M <sub>0</sub> , T <sub>3</sub> N <sub>1</sub> M <sub>0</sub> , T <sub>3</sub> N <sub>2</sub> M <sub>0</sub> /Stage IIIA | 13                                              | 5         |
| T <sub>4</sub> N <sub>0</sub> M <sub>0</sub> /Stage IIIB                                                                                                                                              | –                                               | 2         |
| N <sub>0</sub> Stage (no metastases)                                                                                                                                                                  | 13                                              | 7         |
| N <sub>1</sub> Stage +N <sub>2</sub> Stage (with metastases)                                                                                                                                          | 20                                              | 6         |
| <b>Total:</b>                                                                                                                                                                                         | <b>33</b>                                       | <b>13</b> |

Note: SCC – Squamous Cell Carcinoma; ADC – adenocarcinoma.

**Table S2. Primers and TaqMan probes for qPCR.**

| Gene                 | Primers (F, R) and probe (Z) sequences 5'→3' |                                        | Amplicon length |
|----------------------|----------------------------------------------|----------------------------------------|-----------------|
| <i>CTDSPL</i> (cDNA) | F                                            | CCACCATTCTCCTCCACCAGT                  | 154             |
|                      | R                                            | CCACCATTCTCCTCCACCAGT                  |                 |
|                      | Z                                            | FAM-CCACATTGTAATCACGGAAGCAGCAGA-BHQ1   |                 |
| <i>CTDSPL</i> (DNA)  | F                                            | CAGAGTGCGTGTGCCGACT                    | 126             |
|                      | R                                            | ACAACCTTCTCTGCGGGCGT                   |                 |
|                      | Z                                            | FAM-CTGGCGGAGAGACTGGGAGCGA-BHQ1        |                 |
| <i>ACTB</i> (DNA)    | F                                            | GTGCTCAGGGCTTCTTGTCCTTT                | 160             |
|                      | R                                            | TTTCTCCATGTCGTCCCAGTTGGT               |                 |
|                      | Z                                            | FAM-AAGGATTCCTATGTGGGCGACGAGGCCCA-BHQ1 |                 |
| <i>RPNI</i> (cDNA)   | F                                            | CACCCTCAACAGTGGCAAGAAG                 | 125             |
|                      | R                                            | TGCATTTGCTCACTCTGTGC                   |                 |
|                      | Z                                            | FAM-CCCTCTGTCTTCAGCCTGGACTGC-BHQ1      |                 |

Note: F – forward primer; R – reverse primer; Z – probe.

**Table S3. Differential expression of *CTDSP1/2/L/L2* and *RB1* in non-small cell lung cancer according to TCGA data.**

| Gene Name | Pooled samples |          |          |                  |                  |           |          | Paired samples |          |          |           |          |  |
|-----------|----------------|----------|----------|------------------|------------------|-----------|----------|----------------|----------|----------|-----------|----------|--|
|           | Log2FC         | FDR      | P-value  | Rel. StDev(T), % | Rel. StDev(N), % | Tumor CPM | Norm CPM | Log2FC (mean)  | FDR      | P-value  | Tumor CPM | Norm CPM |  |
| CTDSPL    | -1,2           | 5,03E-52 | 1,01E-52 | 45,0             | 27,9             | 43,5      | 101,2    | -1,0           | 1,39E-11 | 2,78E-12 | 50,9      | 101,2    |  |
| CTDSP1    | -0,6           | 1,25E-18 | 5,01E-19 | 33,0             | 16,7             | 118,0     | 176,1    | -0,6           | 2,38E-09 | 9,51E-10 | 122,1     | 176,1    |  |
| CTDSPL2   | 0,6            | 1,38E-07 | 8,27E-08 | 45,2             | 20,8             | 44,6      | 29,3     | 0,6            | 1,61E-07 | 9,64E-08 | 46,8      | 29,3     |  |
| CTDSP2    | -0,4           | 3,28E-05 | 2,62E-05 | 49,3             | 22,0             | 272,4     | 368,0    | -0,3           | 0,000368 | 0,000295 | 306,5     | 368,0    |  |
| RB1       | 0,0            | 0,85922  | 0,85922  | 48,0             | 21,4             | 61,4      | 60,8     | -0,3           | 0,951593 | 0,951593 | 62,1      | 60,8     |  |

(A) Relative expression level of *CTDSP1/2/L/L2* and *RB1* genes in lung squamous cell carcinomas (TCGA LUSC dataset). Log2FC – binary logarithm of expression level fold change (tumor versus normal); FDR – false discovery rate; Rel. StDev. - relative standard deviation (also named CV, coefficient of variation) of the expression levels; CMP – read counts per million.

| Gene Name | Pooled samples |          |          |                  |                  |           |          | Paired samples |          |          |           |          |  |
|-----------|----------------|----------|----------|------------------|------------------|-----------|----------|----------------|----------|----------|-----------|----------|--|
|           | Log2FC         | FDR      | P-value  | Rel. StDev(T), % | Rel. StDev(N), % | Tumor CPM | Norm CPM | Log2FC (mean)  | FDR      | P-value  | Tumor CPM | Norm CPM |  |
| CTDSPL    | -1,1           | 4,81E-40 | 9,62E-41 | 52,2             | 21,6             | 54,0      | 118,9    | -1,2           | 1,55E-19 | 3,11E-20 | 50,8      | 118,1    |  |
| CTDSP1    | -0,3           | 1,33E-08 | 5,3E-09  | 29,1             | 15,2             | 148,4     | 186,2    | -0,5           | 2,16E-10 | 8,66E-11 | 136,9     | 186,1    |  |
| RB1       | -0,4           | 1,71E-08 | 1,02E-08 | 41,2             | 19,7             | 46,8      | 63,5     | -0,4           | 1,3E-05  | 7,82E-06 | 52,0      | 63,3     |  |
| CTDSP2    | -0,4           | 0,000183 | 0,000147 | 51,5             | 17,0             | 284,1     | 383,0    | -0,3           | 0,126101 | 0,100881 | 291,9     | 382,2    |  |
| CTDSPL2   | -0,1           | 0,779243 | 0,779243 | 38,6             | 19,0             | 29,4      | 30,6     | 0,0            | 0,424956 | 0,424956 | 31,9      | 30,7     |  |

(B) Relative expression level of *CTDSP1/2/L/L2* and *RB1* genes in lung adenocarcinoma (TCGA LUAD dataset). Log2FC – binary logarithm of expression level fold change (tumor versus normal); FDR – false discovery rate; Rel. StDev. - relative standard deviation (also named CV, coefficient of variation) of the expression levels; CMP – read counts per million.

**Table S4. Differential expression of mir-26a/b in non-small cell lung cancer according to TCGA data.**

| miRNA         | Pooled samples |          |          |                 |                 |           |          |               | Paired samples |          |           |          |                          |
|---------------|----------------|----------|----------|-----------------|-----------------|-----------|----------|---------------|----------------|----------|-----------|----------|--------------------------|
|               | Log2FC         | FDR      | P-value  | Rel. StDev(T) % | Rel. StDev(N) % | Tumor CPM | Norm CPM | Log2FC (mean) | FDR            | P-value  | Tumor CPM | Norm CPM | Log2FC profile           |
| hsa-mir-26a-2 | -1,3           | 5,96E-30 | 1,2E-31  | 53,9            | 55,5            | 2762,9    | 6624,1   | -1,1          | 4,89E-10       | 1,03E-11 | 3740,0    | 7612,0   |                          |
| hsa-mir-26b   | -0,3           | 0,822456 | 0,172983 | 51,4            | 41,9            | 626,8     | 761,3    | -0,8          | 3,71E-08       | 1,06E-09 | 497,9     | 849,5    |                          |
| hsa-mir-26a-1 |                |          |          |                 |                 | 1,0       | 0,6      |               |                |          | 0,8       | 0,6      | discarded. too few reads |

(A) Relative expression level of mir-26a/b in lung squamous cell carcinomas (TCGA LUSC dataset). Log2FC – binary logarithm of expression level fold change (tumor versus normal); FDR – false discovery rate; Rel. StDev. - relative standard deviation (also named CV, coefficient of variation) of the expression levels; CMP – read counts per million.

| miRNA         | Pooled samples |          |          |                 |                 |           |          |               | Paired samples |          |           |          |                          |
|---------------|----------------|----------|----------|-----------------|-----------------|-----------|----------|---------------|----------------|----------|-----------|----------|--------------------------|
|               | Log2FC         | FDR      | P-value  | Rel. StDev(T) % | Rel. StDev(N) % | Tumor CPM | Norm CPM | Log2FC (mean) | FDR            | P-value  | Tumor CPM | Norm CPM | Log2FC profile           |
| hsa-mir-26a-2 | -1,4           | 4,11E-66 | 3,54E-68 | 38,9            | 31,9            | 1908,0    | 5136,9   | -1,6          | 1,35E-12       | 1,29E-14 | 1757,8    | 5136,9   |                          |
| hsa-mir-26b   | -0,5           | 5,93E-05 | 6,46E-06 | 47,3            | 31,1            | 610,9     | 851,4    | -0,8          | 0,000164       | 1,92E-05 | 506,8     | 851,4    |                          |
| hsa-mir-26a-1 |                |          |          |                 |                 | 1,4       | 1,3      |               |                |          | 1,2       | 1,3      | discarded. too few reads |

(B) Relative expression level of mir-26a/b in lung adenocarcinoma (TCGA LUAD dataset). Log2FC – binary logarithm of expression level fold change (tumor versus normal); FDR – false discovery rate; Rel. StDev. - relative standard deviation (also named CV, coefficient of variation) of the expression levels; CMP – read counts per million.

**Table S5. Summary of qPCR data for *CTDSPL*, *CTDSP1*, *CTDSP2* and *RBI* genes in non-small cell lung cancer (NSCLC: ADC and SCC).**

| Quantitative characteristics                              | ADC               | SCC               | ADC               | SCC               |
|-----------------------------------------------------------|-------------------|-------------------|-------------------|-------------------|
|                                                           | <i>CTDSPL</i>     |                   | <i>RBI</i>        |                   |
| Average mRNA level fold change                            | 6.7↓ <sup>a</sup> | 6.8↓ <sup>a</sup> | 4.6↓ <sup>a</sup> | 3.0↓ <sup>a</sup> |
| <i>FD</i> , %                                             | 77                | 72                | 69                | 59                |
| <i>LD<sub>av</sub></i> , n-fold                           | 8.3↓              | 8.9↓              | 6↓                | 4.3↓              |
| <i>FI</i> , %                                             | no                | 3                 | 7                 | 3                 |
| <i>LI<sub>av</sub></i> , n-fold                           | no                | 2                 | 2.5               | 2.5               |
| Average mRNA level for groups without and with metastasis | 2.6↓<br>(no met)  | 3.9↓<br>(no met)  | 1.7↓<br>(no met)  | 2.6↓<br>(no met)  |
|                                                           | 11.6↓<br>(met)    | 8.7↓<br>(met)     | 7.9↓<br>(met)     | 3.3↓<br>(met)     |
|                                                           | <i>P</i> < 0.01   | <i>P</i> = 0.62   | <i>P</i> < 0.01   | <i>P</i> = 0.66   |
|                                                           | <i>CTDSP1</i>     |                   | <i>CTDSP2</i>     |                   |
| Average mRNA level for all samples, n-fold                | 3.6↓ <sup>a</sup> | 3.5↓ <sup>a</sup> | 5.2↓ <sup>a</sup> | 4.0↓ <sup>a</sup> |
| <i>FD</i> , %                                             | 64                | 68                | 90                | 70                |
| <i>LD<sub>av</sub></i> , n-fold                           | 4.6↓              | 4.5↓              | 5.7↓              | 5.2↓              |
| <i>FI</i> , %                                             | no                | no                | no                | no                |
| <i>LI<sub>av</sub></i> , n-fold                           | no                | no                | no                | no                |
| Average mRNA level for groups without and with metastasis | 2.0↓<br>(no met)  | 2.4↓<br>(no met)  | 4.6↓<br>(no met)  | 2.5↓<br>(no met)  |
|                                                           | 5.3↓<br>(met)     | 4.2↓<br>(met)     | 5.8↓<br>(met)     | 5.0↓<br>(met)     |
|                                                           | <i>P</i> < 0.05   | <i>P</i> = 0.27   | <i>P</i> < 0.06   | <i>P</i> = 0.59   |

Note: *LD<sub>av</sub>*, average mRNA level decrease; *LI<sub>av</sub>*, average mRNA level increase; *FD*, frequency of decrease; *FI*, frequency of increase; ↑, increase; ↓, decrease; met, metastases; ADC (N=13) and SCC (N=33); <sup>a</sup>*P* < 0.02 for each value.

**Table S6. Top scored common regulatory microRNAs for SCP subfamily genes (lung SCC). Orange background highlights the members of oncogenic mir-96/182/183 family, which are overexpressed in NSCLC.**

|                | CTDSP2   | RB1      | CTDSP2   | CTDSP1   | CTDSP1   |       |          |          |        |
|----------------|----------|----------|----------|----------|----------|-------|----------|----------|--------|
| LogFC [pooled] | -0,1     | -0,4     | -0,4     | -0,3     | -1,1     |       |          |          |        |
| FDR            | 0,779243 | 1,71E-08 | 0,000183 | 1,33E-08 | 4,81E-40 |       |          |          |        |
| avg. CPM       | 30,0     | 55,2     | 333,6    | 167,3    | 86,4     |       |          |          |        |
| LogFCs         |          |          |          |          |          | LogFC | FDR      | avg. CPM | LogFCs |
| hsa-mir-183    | 0,11     | -0,20    | -0,14    | -0,24    | -0,27    | 2,2   | 2,5E-07  | 6288,7   |        |
| hsa-mir-20a    | -0,20    | -0,31    | -0,26    | 0,03     | -0,26    | 0,9   | 8,7E-05  | 173,3    |        |
| hsa-mir-93     | -0,12    | -0,43    | -0,27    | -0,14    | -0,35    | 1,2   | 6,33E-07 | 2744,3   |        |
| hsa-mir-182    | 0,05     | -0,19    | -0,14    | -0,10    | -0,16    | 1,9   | 4,41E-10 | 13736,6  |        |
| hsa-mir-9-2    | 0,01     | -0,24    | -0,20    | -0,31    | -0,42    | 4,7   | 0,311093 | 380,6    |        |
| hsa-mir-9-1    | 0,01     | -0,24    | -0,20    | -0,31    | -0,41    | 4,7   | 0,311093 | 380,7    |        |
| hsa-mir-96     | -0,18    | -0,38    | -0,28    | -0,10    | -0,34    | 2,6   | 5,43E-09 | 13,9     |        |
| hsa-mir-17     | -0,04    | -0,13    | -0,17    | 0,03     | -0,15    | 0,4   | 0,00715  | 597,3    |        |
| hsa-mir-29b-1  | -0,46    | -0,19    | -0,22    | 0,14     | -0,12    | 1,1   | 1,7E-06  | 317,9    |        |
| hsa-mir-30b    | -0,36    | -0,25    | -0,03    | 0,22     | 0,20     | -0,6  | 0,012228 | 666,3    |        |
| hsa-mir-34a    | -0,48    | -0,32    | -0,08    | 0,15     | 0,01     | 0,7   | 2,26E-05 | 173,8    |        |
| hsa-mir-424    | 0,00     | -0,09    | -0,10    | -0,19    | -0,30    | 1,2   | 0,003977 | 54,4     |        |
| hsa-mir-142    | -0,19    | -0,14    | -0,19    | -0,23    | -0,34    | 1,7   | 6,98E-08 | 1446,6   |        |
| hsa-mir-106a   | -0,11    | -0,23    | -0,26    | -0,09    | -0,30    | 0,7   | 0,058244 | 8,7      |        |
| hsa-mir-130b   | -0,01    | -0,28    | -0,16    | -0,32    | -0,42    | 1,6   | 0,000611 | 20,3     |        |
| hsa-mir-590    | -0,01    | -0,26    | -0,33    | -0,23    | -0,51    | 1,0   | 3,16E-06 | 12,0     |        |
| hsa-mir-128-1  | -0,34    | 0,02     | -0,11    | -0,27    | -0,31    | 0,4   | 0,01125  | 70,2     |        |
| hsa-mir-26b    | -0,15    | -0,05    | -0,11    | 0,31     | 0,02     | -0,3  | 0,822456 | 694,0    |        |
| hsa-mir-429    | -0,12    | -0,27    | -0,15    | 0,09     | -0,01    | 1,1   | 3,7E-05  | 84,7     |        |
| hsa-mir-106b   | -0,23    | -0,04    | -0,05    | -0,16    | -0,22    | 0,1   | 1        | 581,5    |        |
| hsa-mir-21     | -0,19    | -0,14    | -0,07    | -0,01    | -0,20    | 1,8   | 1,83E-18 | 229334,6 |        |
| hsa-mir-7-1    | 0,16     | -0,04    | -0,18    | -0,06    | -0,21    | 1,4   | 5,23E-07 | 13,7     |        |
| hsa-mir-199a-1 | -0,22    | -0,12    | -0,01    | -0,07    | -0,08    | 0,8   | 8,13E-07 | 788,9    |        |
| hsa-mir-128-2  | -0,36    | 0,06     | -0,12    | -0,26    | -0,30    | 0,4   | 0,013333 | 54,9     |        |
| hsa-mir-186    | -0,03    | -0,22    | -0,22    | 0,02     | -0,17    | 0,3   | 0,002261 | 233,4    |        |
| hsa-mir-22     | -0,17    | 0,08     | -0,08    | 0,09     | -0,04    | 0,2   | 0,013516 | 69864,3  |        |
| hsa-mir-135b   | -0,22    | -0,11    | -0,08    | 0,28     | 0,12     | 2,5   | 1,22E-06 | 33,4     |        |
| hsa-mir-199a-2 | -0,19    | -0,10    | -0,01    | -0,10    | -0,10    | 0,7   | 1,82E-06 | 1305,3   |        |
| hsa-mir-193b   | -0,13    | -0,18    | -0,12    | -0,01    | -0,32    | 1,6   | 0,00665  | 41,1     |        |
| hsa-mir-19a    | -0,28    | -0,37    | -0,27    | 0,02     | -0,31    | 1,1   | 0,001552 | 14,7     |        |
| hsa-mir-141    | -0,05    | -0,09    | -0,18    | 0,19     | -0,13    | 1,5   | 1,65E-10 | 1029,6   |        |
| hsa-mir-335    | -0,06    | -0,04    | -0,11    | -0,16    | -0,14    | -0,1  | 1        | 119,9    |        |
| hsa-mir-33a    | -0,09    | -0,20    | -0,25    | -0,15    | -0,25    | 1,3   | 2,13E-05 | 13,4     |        |
| hsa-mir-155    | -0,11    | 0,02     | -0,01    | -0,19    | -0,10    | 0,2   | 0,626623 | 383,4    |        |
| hsa-mir-199b   | -0,16    | -0,08    | -0,01    | -0,12    | -0,11    | 0,7   | 1,15E-05 | 1652,4   |        |
| hsa-mir-210    | -0,11    | -0,27    | -0,21    | -0,12    | -0,42    | 5,1   | 1,23E-08 | 479,9    |        |
| hsa-mir-30d    | -0,10    | -0,04    | 0,11     | 0,22     | 0,40     | -1,1  | 8,11E-11 | 18255,4  |        |
| hsa-mir-194-2  | -0,06    | -0,01    | -0,16    | 0,15     | 0,03     | 1,2   | 0,546912 | 134,1    |        |
| hsa-mir-29b-2  | -0,47    | -0,21    | -0,21    | 0,16     | -0,10    | 1,1   | 2,01E-06 | 343,1    |        |
| hsa-mir-20b    | -0,10    | -0,28    | -0,21    | -0,15    | -0,37    | 0,7   | 0,278212 | 10,8     |        |

**Comments:** Top-40 potential regulating microRNA are listed. The values in each cell represent coefficient of Spearman correlation between the gene and the microRNA expression level. The bars inside cells (regardless of color) indicate prediction score of microRNA binding site according to several databases (from left to right): miRTarBase (strong experimental evidence), TargetScan (conservative binding sites, CS), PicTar (CS), DIANA microT, mirSVR (CS), TargetScan (non-CS), PicTar (non-CS), miRTarBase (weak experimental evidence), mirSVR (non-CS). Cell borders indicate miRNA-gene pairs with predicted binding site (dashed border – only non-CS sites; double border – several reliable algorithms). On the right side of the figure, expression profiles of microRNAs in paired tumor-normal samples are presented in logarithmic scale (from -2 to +2, e.g. from 4-fold decrease to 4-fold increase). MicroRNAs are sorted by overall prediction score (decreasing).

**Table S7. Top scored common regulatory microRNA for SCP subfamily genes (lung ADC). Orange background highlights the members of oncogenic mir-96/182/183 family, which are overexpressed in NSCLC.**

|               | CTDSP2   | RB1     | CTDSP2   | CTDSP1   | CTDSP1   |       |          |          |        |
|---------------|----------|---------|----------|----------|----------|-------|----------|----------|--------|
| LogFC         | 0,6      | 0,0     | -0,4     | -0,6     | -1,2     |       |          |          |        |
| FDR           | 1,38E-07 | 0,85922 | 3,28E-05 | 1,25E-18 | 5,03E-52 |       |          |          |        |
| avg. CPM      | 36,9     | 61,1    | 320,2    | 147,1    | 72,3     |       |          |          |        |
| LogFCs        |          |         |          |          |          | LogFC | FDR      | avg. CPM | LogFCs |
| hsa-mir-183   | 0,30     | -0,06   | -0,17    | -0,27    | -0,27    | 2,5   | 3,77E-09 | 7902,0   |        |
| hsa-mir-182   | 0,20     | -0,08   | -0,18    | -0,21    | -0,22    | 1,8   | 7,43E-07 | 15679,5  |        |
| hsa-mir-96    | 0,20     | -0,12   | -0,29    | -0,22    | -0,26    | 2,6   | 8,94E-08 | 18,4     |        |
| hsa-mir-30b   | -0,34    | -0,15   | -0,07    | 0,29     | 0,24     | -2,0  | 1,28E-54 | 864,0    |        |
| hsa-let-7a-1  | -0,16    | 0,04    | 0,19     | 0,17     | 0,28     | -1,3  | 2,75E-47 | 10392,0  |        |
| hsa-let-7a-3  | -0,16    | 0,04    | 0,19     | 0,17     | 0,28     | -1,3  | 3,89E-47 | 10439,5  |        |
| hsa-mir-9-2   | 0,27     | -0,11   | -0,21    | -0,27    | -0,31    | 5,3   | 0,001594 | 1239,4   |        |
| hsa-mir-9-1   | 0,27     | -0,11   | -0,21    | -0,27    | -0,31    | 5,3   | 0,001594 | 1240,6   |        |
| hsa-mir-30a   | -0,32    | 0,00    | 0,19     | 0,21     | 0,28     | -3,5  | 1,1E-107 | 82918,9  |        |
| hsa-mir-26b   | -0,32    | -0,13   | -0,06    | 0,49     | 0,10     | -0,5  | 5,93E-05 | 731,1    |        |
| hsa-mir-26a-2 | -0,35    | -0,08   | 0,26     | 0,25     | 0,27     | -1,4  | 4,11E-66 | 3522,5   |        |
| hsa-mir-22    | -0,33    | 0,12    | 0,17     | 0,11     | 0,31     | -0,9  | 2,06E-35 | 135077,1 |        |
| hsa-mir-29a   | -0,44    | -0,07   | 0,13     | 0,25     | 0,23     | -1,5  | 1,06E-45 | 11668,1  |        |
| hsa-mir-149   | 0,28     | 0,04    | -0,17    | 0,08     | -0,15    | 2,8   | 4,76E-08 | 116,4    |        |
| hsa-mir-30d   | -0,23    | -0,09   | 0,14     | 0,19     | 0,27     | -2,7  | 2,53E-93 | 21762,1  |        |
| hsa-let-7g    | -0,19    | -0,07   | 0,02     | 0,10     | 0,14     | -0,4  | 4,49E-06 | 554,3    |        |
| hsa-mir-7-1   | 0,31     | -0,10   | -0,19    | -0,24    | -0,20    | 1,0   | 6,16E-06 | 22,1     |        |
| hsa-mir-486   | -0,17    | -0,01   | 0,13     | 0,19     | 0,28     | -3,9  | 9,56E-58 | 852,1    |        |
| hsa-mir-132   | -0,19    | -0,02   | 0,17     | -0,01    | 0,13     | -0,3  | 0,039192 | 123,6    |        |
| hsa-mir-15b   | 0,08     | -0,07   | -0,27    | -0,15    | -0,09    | 0,1   | 1        | 288,8    |        |
| hsa-let-7e    | -0,15    | -0,14   | 0,28     | 0,15     | 0,14     | -0,7  | 1,99E-06 | 1169,6   |        |
| hsa-mir-34a   | -0,32    | -0,12   | -0,05    | 0,18     | 0,22     | -0,9  | 1,27E-21 | 239,4    |        |
| hsa-mir-93    | -0,28    | -0,02   | -0,30    | -0,26    | -0,23    | 0,8   | 5,08E-05 | 7120,1   |        |
| hsa-mir-192   | 0,09     | -0,01   | -0,08    | -0,19    | -0,07    | 0,3   | 1        | 369,5    |        |
| hsa-mir-143   | -0,22    | 0,10    | 0,27     | 0,14     | 0,29     | -2,0  | 2,51E-47 | 124933,5 |        |
| hsa-mir-139   | -0,36    | -0,03   | 0,10     | 0,16     | 0,27     | -2,9  | 1,65E-68 | 130,6    |        |
| hsa-mir-374b  | -0,24    | -0,23   | 0,02     | 0,18     | 0,14     | -1,0  | 3,86E-27 | 87,3     |        |
| hsa-mir-29b-1 | -0,39    | -0,15   | -0,12    | 0,12     | -0,03    | -0,4  | 0,22746  | 375,7    |        |
| hsa-mir-424   | -0,04    | -0,02   | -0,09    | -0,02    | -0,16    | 1,0   | 2,24E-05 | 52,7     |        |
| hsa-mir-10a   | -0,22    | -0,01   | 0,26     | 0,20     | 0,17     | -1,2  | 1,09E-16 | 36539,0  |        |
| hsa-let-7b    | -0,09    | 0,12    | 0,30     | 0,23     | 0,37     | -1,3  | 2,7E-30  | 24275,7  |        |
| hsa-mir-224   | 0,15     | 0,06    | -0,22    | -0,28    | -0,17    | 2,5   | 0,000139 | 93,0     |        |
| hsa-mir-155   | -0,22    | -0,02   | -0,06    | -0,05    | -0,11    | 0,1   | 1        | 469,1    |        |
| hsa-mir-101-2 | -0,31    | -0,05   | 0,03     | 0,11     | 0,23     | -2,1  | 2,15E-58 | 100,2    |        |
| hsa-mir-338   | -0,31    | -0,03   | 0,00     | 0,19     | 0,16     | -2,9  | 7,8E-44  | 1863,0   |        |
| hsa-mir-130b  | 0,40     | -0,04   | -0,12    | -0,22    | -0,27    | 2,2   | 3,57E-12 | 30,8     |        |
| hsa-mir-20a   | 0,10     | -0,01   | -0,23    | -0,15    | -0,08    | 0,4   | 0,105018 | 448,4    |        |
| hsa-mir-141   | 0,18     | 0,02    | -0,22    | -0,10    | -0,20    | 1,4   | 6,64E-09 | 1420,0   |        |
| hsa-mir-128-1 | 0,39     | -0,02   | -0,10    | -0,29    | -0,11    | 0,5   | 0,015337 | 113,8    |        |
| hsa-mir-193a  | -0,21    | 0,09    | 0,24     | 0,06     | 0,20     | -0,5  | 0,005131 | 279,3    |        |

**Comments:** Top-40 potential regulating microRNA are presented. The values in each cell represent coefficient of Spearman correlation between gene and microRNA expression level. The bars inside cells (regardless of color) indicate prediction score of microRNA binding site according to several databases (from left to right): miRTarBase (strong experimental evidence), TargetScan (conservative binding sites, CS), PicTar (CS), DIANA microT, mirSVR (CS), TargetScan (non-CS), PicTar (non-CS), miRTarBase (weak experimental evidence), mirSVR (non-CS). Cell borders indicate miRNA-gene pairs with predicted binding site (dashed border – only non-CS sites; double border – several reliable algorithms). On the right side of the figure, expression profiles of microRNAs in paired tumor-

normal samples are presented in logarithmic scale (from -2 to +2, e.g. from 4-fold decrease to 4-fold increase).  
MicroRNAs are sorted by overall prediction score (decreasing).

## Figures S1 to S5

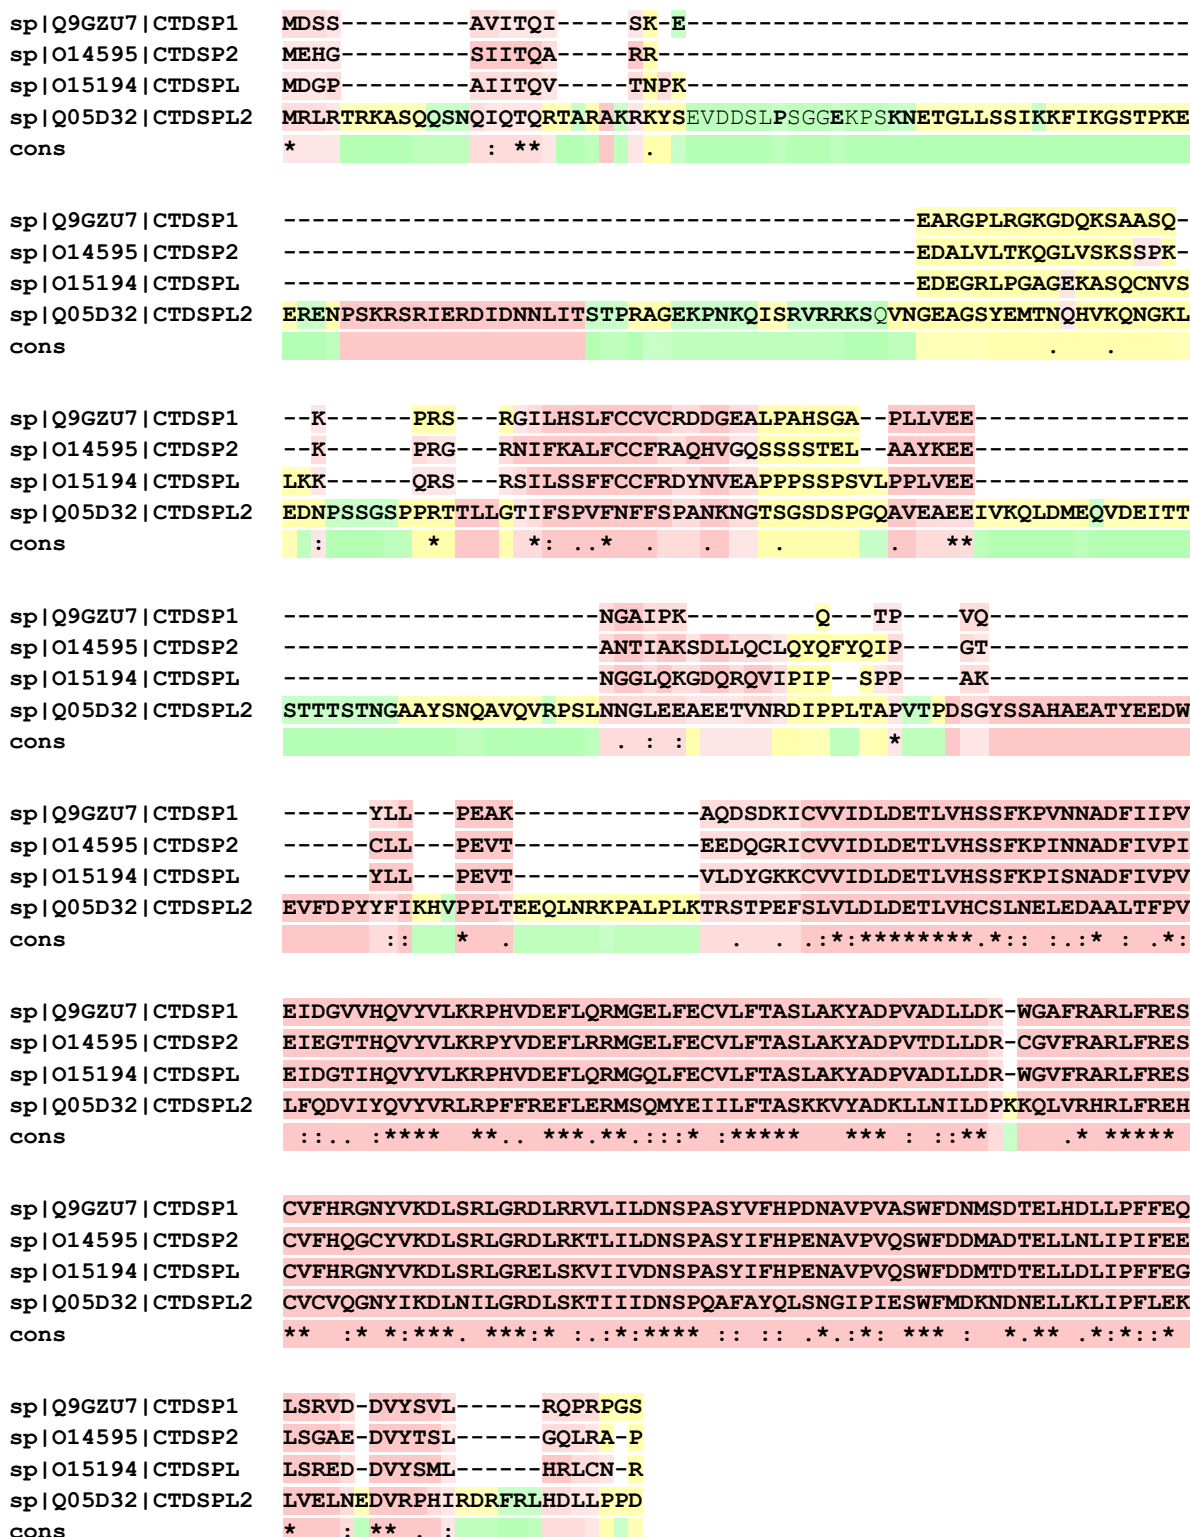

Alignment score: BAD AVG GOOD

**Figure S1. Multiple sequence alignment of the active site regions of CTDSP1/2/L/L2 proteins (performed by T-COFFEE, version 11). Color indicates alignments score (from deep purple to light red). The following UniProt sequences have been used: Q9GZU7 (CTDSP1), O14595 (CTDSP2), O15194 (CTDSPL), Q05D32 (CTDSPL2).**



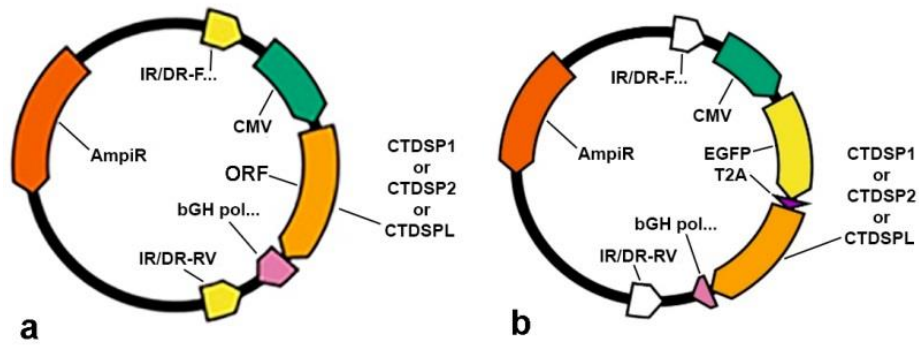

**Figure S2. Plasmid design.** (a) Plasmids pT2/HB-CMV-CTDSP1, -CTDSP2, or -CTDSPL (5168bp, 5201bp, or 5261 bp). IR/DR-FW sequence: 117-347; CMV promoter: 464-1049; open reading frame: 1006-1807, 1006-1840, or 1006-1900 (CTDSP1, CTDSP2, or CTDSPL, accordingly); bGHpA polyadenylation signal: 1834-2037 (+33 or +93 for CTDSP2 or CTDSPL); IR/DR-RV sequence: 2115-2326 (+33, +93 for CTDSP2, CTDSPL); Ampicillin Resistance Gene: 3629-4489 (+33, +93 for CTDSP2, CTDSPL). (b) Scheme of genetic constructs pT2 / HB-CMV-EGFP-2A-CTDSP1 (5951 bp), pT2 / HB-CMV-EGFP-2A-CTDSP2 (5984 bp), and pT2 / HB-CMV-EGFP-2A-CTDSPL (6044 bp).

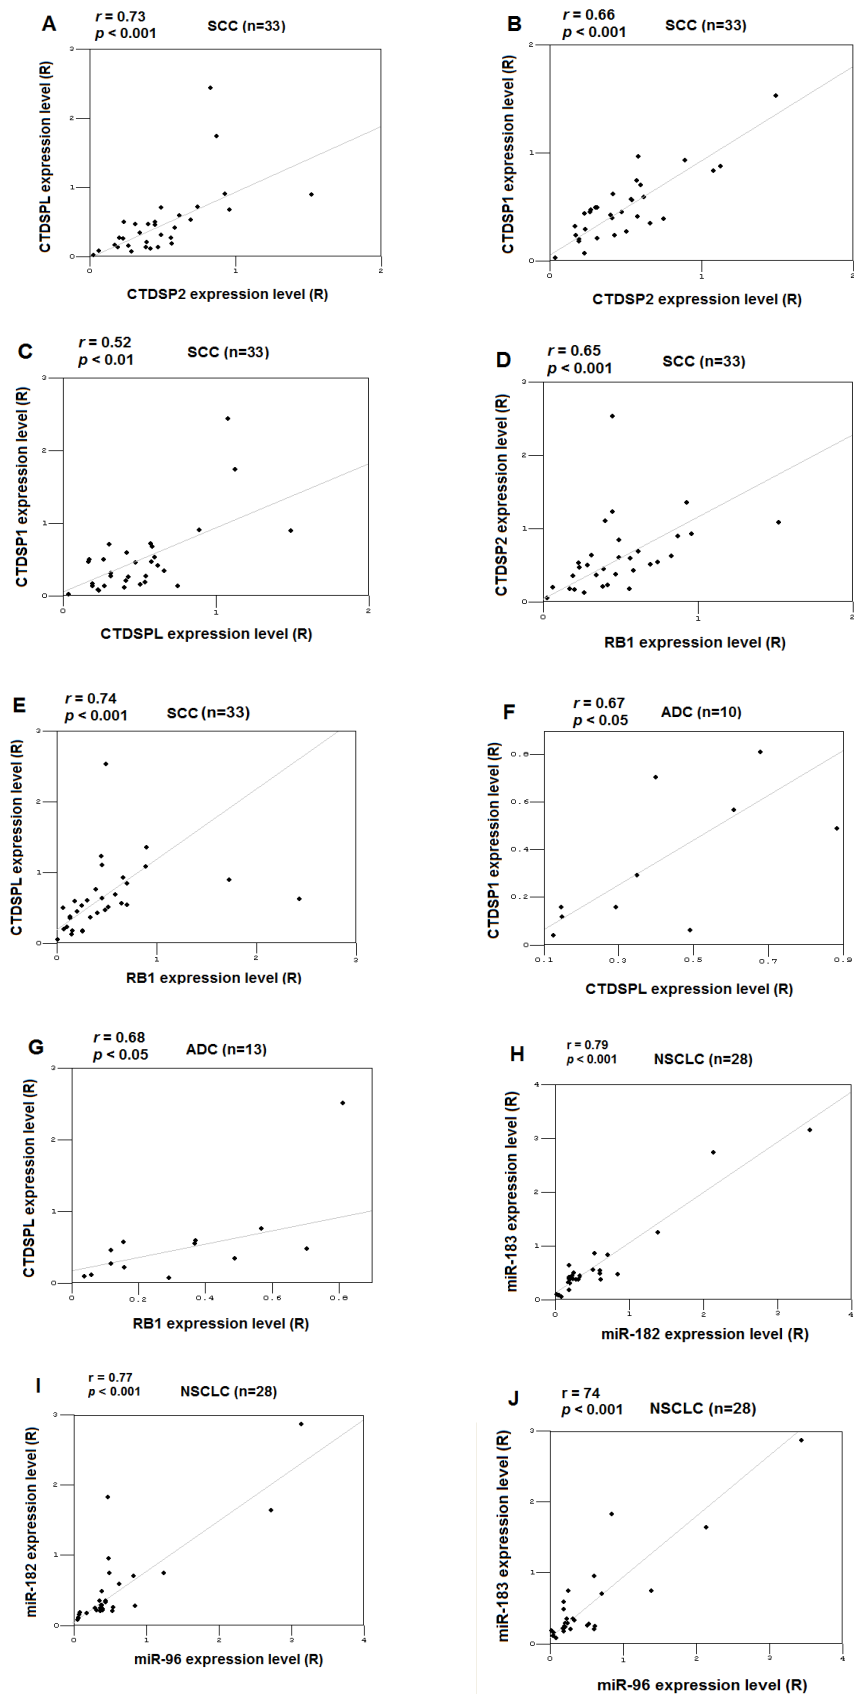

**Figure S3.** The values of correlation coefficients ( $r_s$ ) between the mRNA levels of CTDSP1/2/L and RB1 genes in primary NSCLC samples: SCC (A-E) and ADC (F, G) and correlation between miR-183, miR-96 and miR-182 expression in NSCLC samples (H-J).

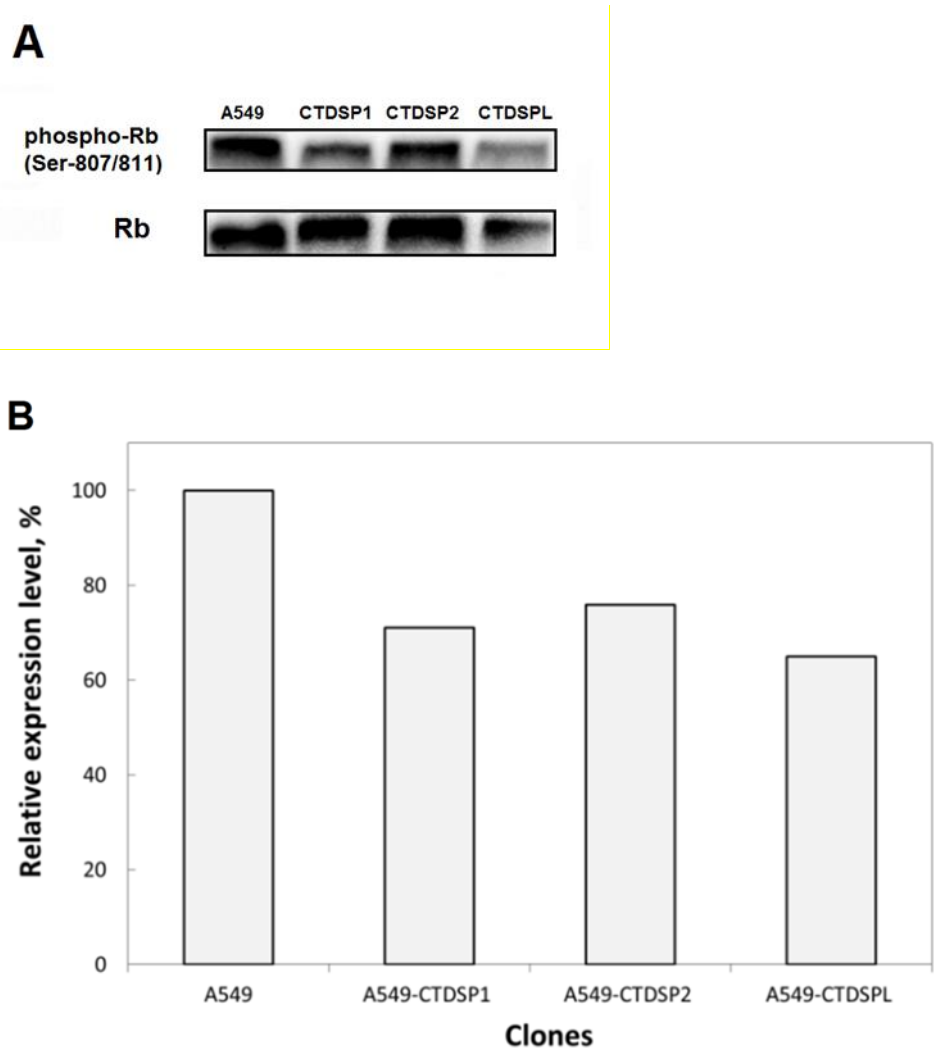

**Figure S4. Alterations in the phosphorylation level of Rb at Ser-807/811 in A549 cells transfected with *CTDSP1*, *CTDSP2*, or *CTDSPL*.** (A) Western blot showing phospho-Rb and total Rb content in selected clones of A549 cells transfected with pT2/HB-CMV-*CTDSP1*, 2, or L. (B) Quantification of Western blot experiment. The plot demonstrates the relative phosphorylation level of Rb at Ser-807/811 in the resulting clones compared with the non-transfected A549 cells. For each clone, the density of the phospho-Rb band was divided by the density of the total Rb band and normalized to the non-transfected A549 value. The measurement of target proteins was carried out twice. Band intensity was determined using ImageJ software.

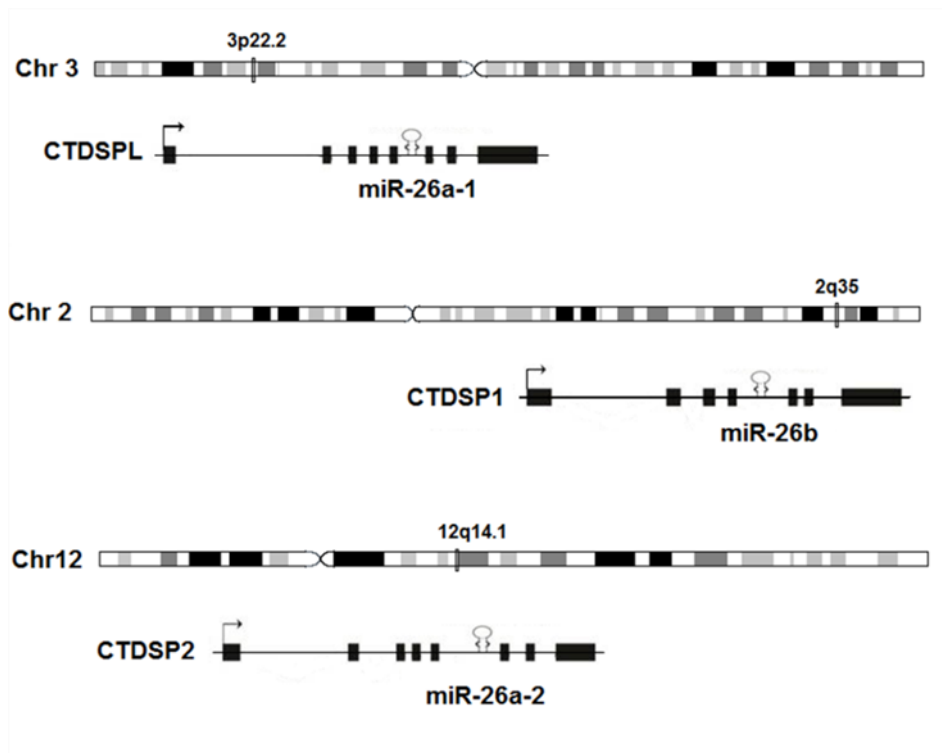

Figure S5. Genomic localization of SCP phosphatases genes and miR26a/b.
